# Supplementary material for: Regulation of Sirt1/Nrf2/TNF-α signaling pathway by luteolin is critical to attenuate acute mercuric chloride exposure induced hepatotoxicity
Source: PubMed Central journal article supplement (PMC5112569; doi:10.1038/srep37157), 2016-11-17
Supplement: srep37157-s1.pdf [file srep37157-s1.pdf]

## **Supplementary Information of**

**Regulation of Sirt1/Nrf2/TNF- $\alpha$  signaling pathway by luteolin is critical to attenuate acute mercuric chloride exposure induced hepatotoxicity**

**Daqian Yang, Xiao Tan, Zhanjun Lv, Biying Liu, Ruiqi Baiyun, Jingjing Lu & Zhigang Zhang\***

College of Veterinary Medicine, Northeast Agricultural University, 59 Mucai Street,

Harbin 150030, China

E-mail address: zhangzhigang@neau.edu.cn

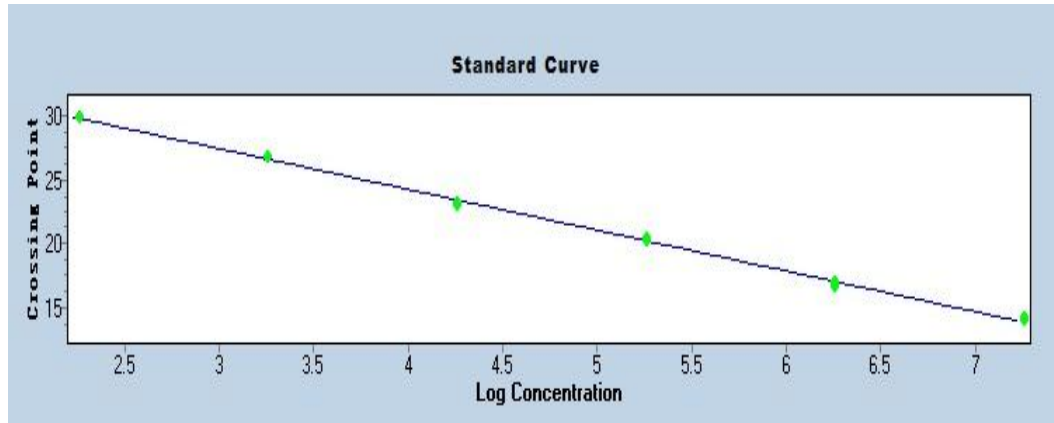

**Figure S1. Standard curve of miRNA-146a was conducted using Roche LightCycler480 (Roche).** The parameters of the standard curve was:  $\log_2 N = -3.176\Delta Ct + 36.91$  ( $R^2 = 0.9981, p < 0.01$ ). PCR efficiency was 106.5 % and the correlation coefficient was 0.9981.

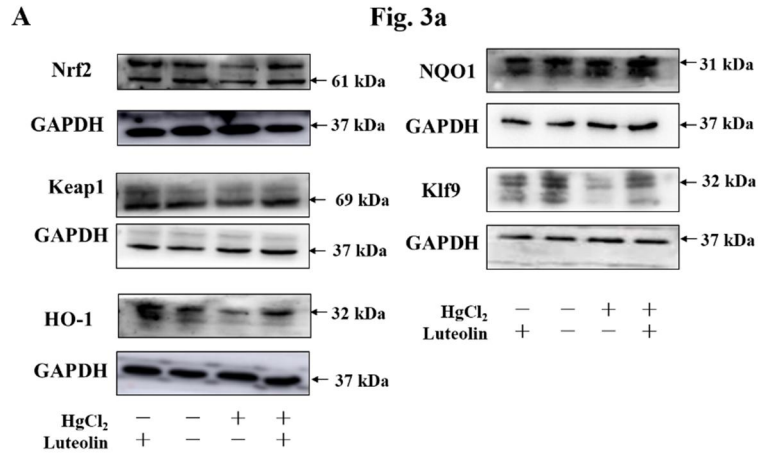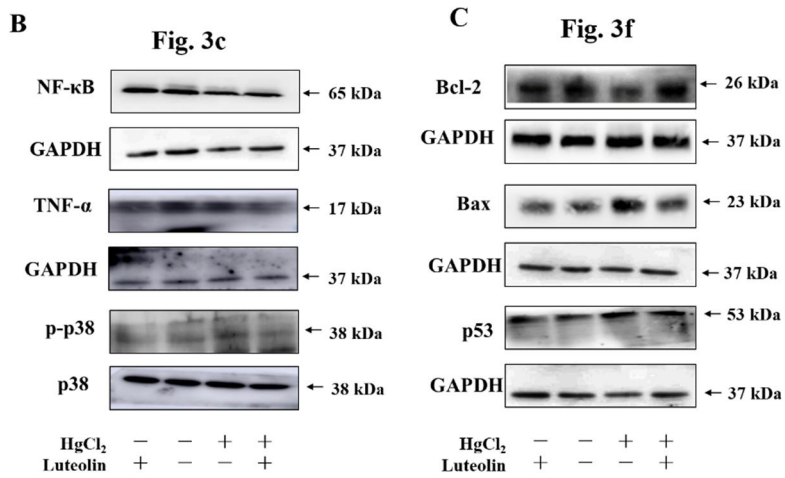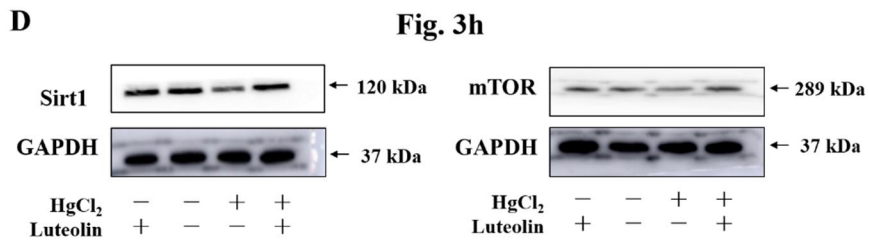

**Figure S2. Original images of cropped blots.**
